# Supplementary material
Source: PubMed Central journal article supplement (PMC5530369)
Supplement: NIHMS872457-supplement-109_2017_1534_MOESM1_ESM.pdf [file NIHMS872457-supplement-109_2017_1534_MOESM1_ESM.pdf]

**ELECTRONIC SUPPLEMENTAL MATERIAL (ESM)**

**J Mol Med 2017**

**CREBH mediates metabolic inflammation to hepatic VLDL overproduction and hyperlipoproteinemia**

Yongyan Song<sup>1</sup>, Miaoyun Zhao<sup>1</sup>, Xiao Cheng<sup>1</sup>, Jing Shen<sup>1</sup>, Rituraj Khound<sup>1</sup>, Kezhong Zhang<sup>2</sup>  
and Qiaozhu Su<sup>1</sup>

<sup>1</sup>The Department of Nutrition and Health Sciences, University of Nebraska-Lincoln,  
Lincoln, NE68583-0806, USA

<sup>2</sup>Center for Molecular Medicine and Genetics, Wayne State University, School of Medicine,  
Detroit, MI 48201, USA

**To whom correspondence should be addressed:**

Dr. Qiaozhu Su

Department of Nutrition and Health Sciences

University of Nebraska-Lincoln

316F Leverton Hall, Lincoln, NE 68583-0806

Telephone: +1 402 472 4038

FAX: +1 402 472 1587

E-mail: qsu2@unl.edu

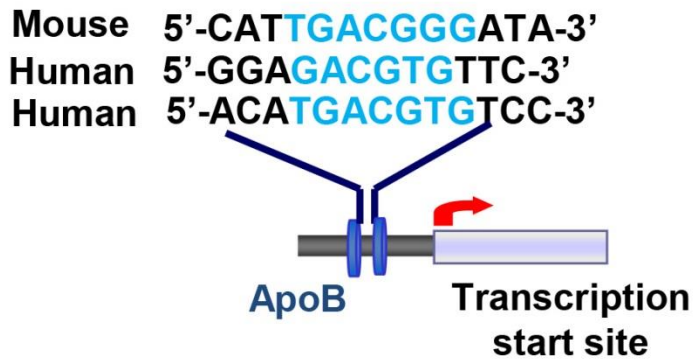

**Supplementary Figure 1.** The proposed CREBH binding elements present in mouse and human apoB gene promoters.

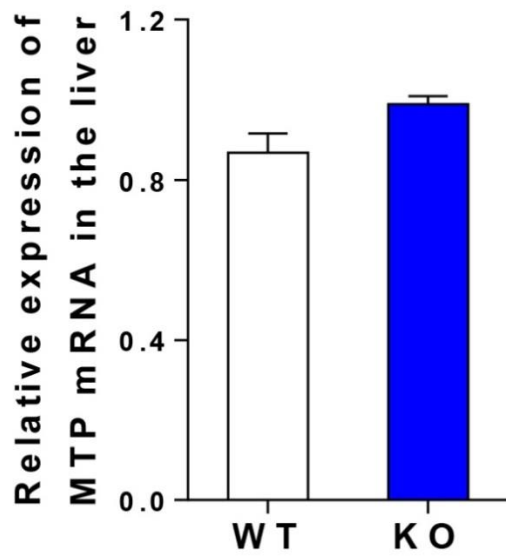

**Supplementary Figure 2.** MTP mRNA from livers of WT and KO mice after a 12h fast.

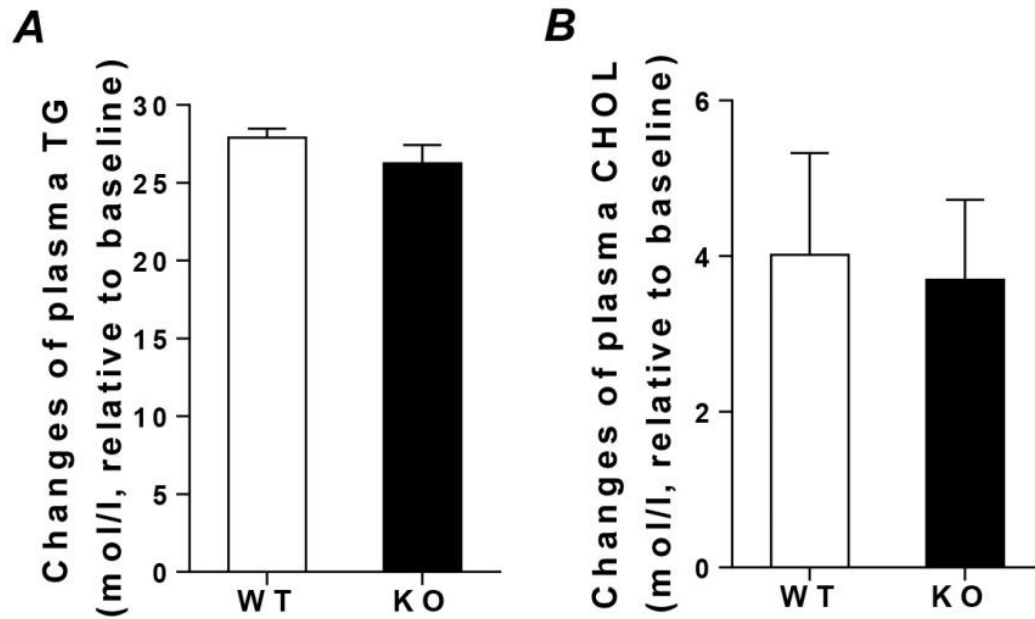

**Supplementary Figure 3.** Blood was collected from WT and KO mice following a 5h fast for baseline control (0h). Mice were then treated with poloxamer (500mg/kg, ip. injection). Mice were sacrificed at 3h after poloxamer treatment. Blood samples were collected for determining the changes of triglyceride (A) and cholesterol (B) contents between baseline (0h) and 3h.

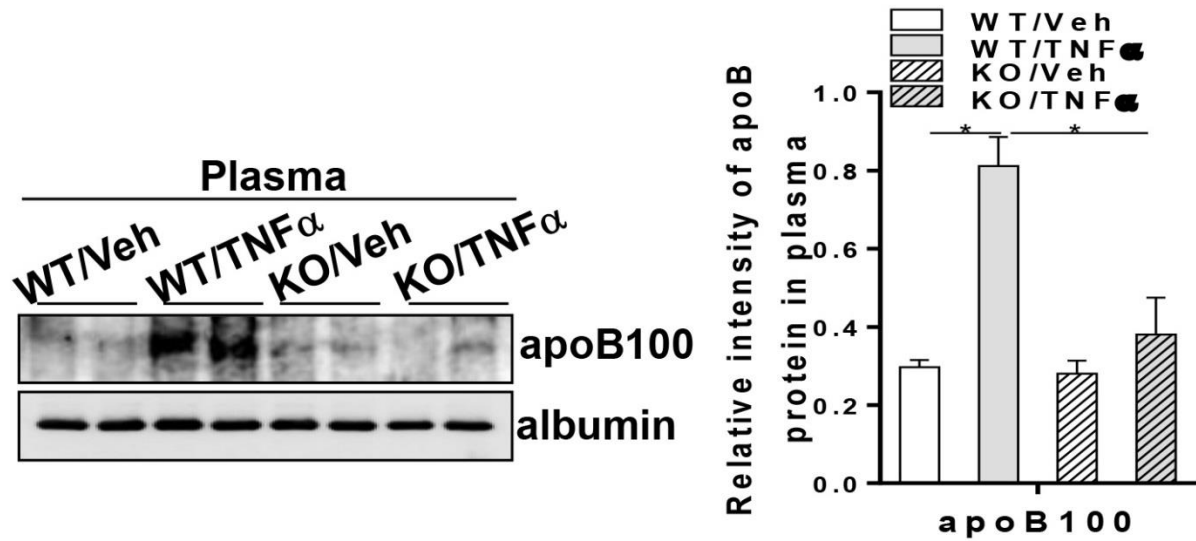

**Supplementary Figure 4.** WT and KO mice were fasted for 6h. Mice were then given either recombinant mouse TNF $\alpha$  (12 $\mu$ g/200g body weight) or vehicle (Veh), saline, as control via ip. injection. Plasmas were collected at 5h post-treatment for immunoblotting the secreted VLDL-apoB100 and albumin. Right panel shows quantification of apoB100 signal intensity to loading control albumin. Results are shown as mean  $\pm$  SEM, n=5-6/group. \*P < 0.05 versus controls.

**A**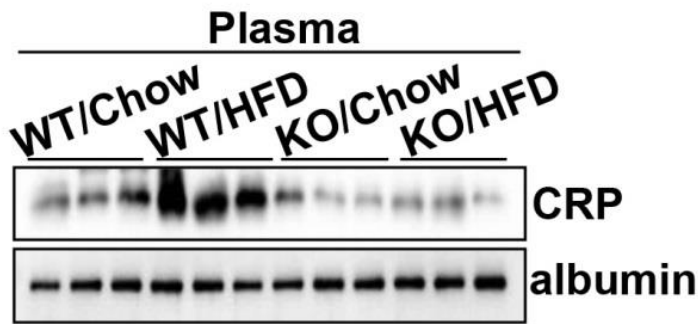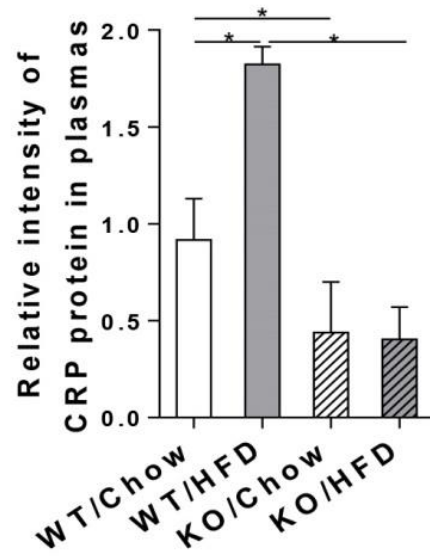**B**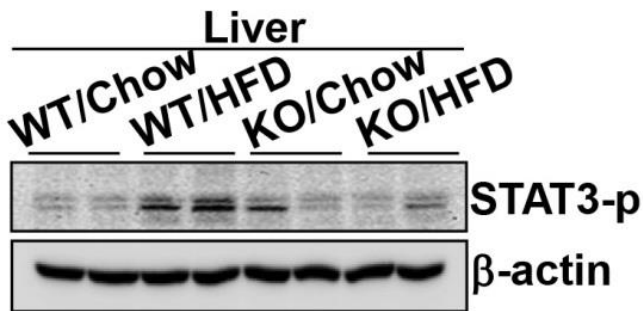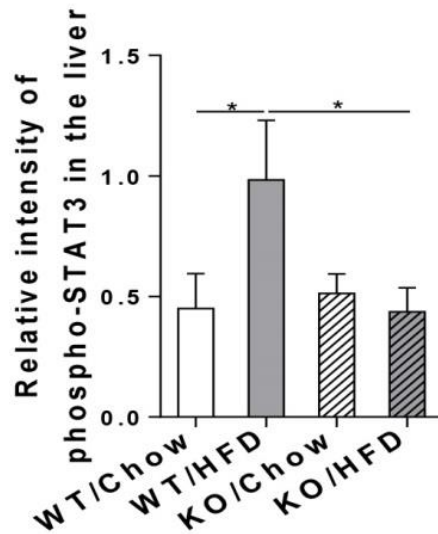

**Supplementary Figure 5.** WT and KO mice were fed with either a chow or a HFD (60% caloric from fat, Dyets #103938) for 7 weeks. Blood samples and liver tissues were collected at the endpoint for analysis. (A) Immunoblotting of liver phosphor-Stat3 and total Stat3. (E) Immunoblotting of plasma C-reactive protein (CRP). Quantifications of Stat3 and apoB protein signal intensity were shown in the right panels. Results are shown as mean  $\pm$  SEM, n=5-6/group. \*P < 0.05 versus controls.
